# Supplementary material
Source: PubMed Central journal article supplement (PMC3744393)

**Fig. S1**

**A**

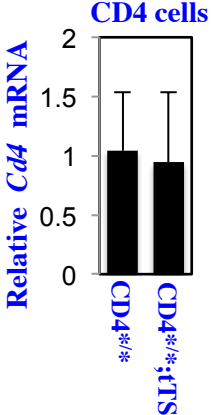

**B**

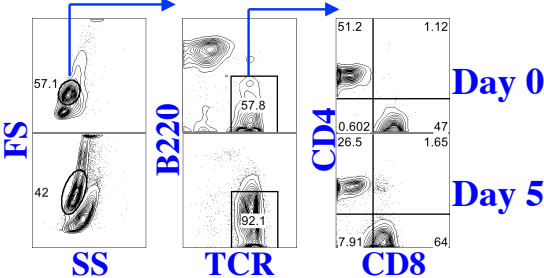

**Fig. S2**

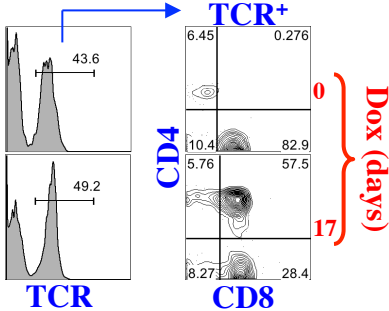

Supplement: NIHMS503192-supplement-supple_figure.pdf [file NIHMS503192-supplement-supple_figure.pdf]
